# Supplementary material
Source: PubMed Central journal article supplement (PMC3255458)
Supplement: NIHMS331063-supplement-1_si_001.pdf [file NIHMS331063-supplement-1_si_001.pdf]

## SUPPORTING INFORMATION

### Encoding Phenotype in Bacteria with an Alternative Genetic Set

Andrew T. Krueger,<sup>†</sup> Larryn W. Peterson,<sup>†</sup> Jijumon Chelliserry, Daniel J. Kleinbaum and Eric T. Kool\*

Department of Chemistry, Stanford University, Stanford, CA 94305

<sup>†</sup>these authors contributed equally to the work.

\*to whom correspondence should be addressed: kool@stanford.edu

#### CONTENTS:

|                                                                                                                                                 |      |
|-------------------------------------------------------------------------------------------------------------------------------------------------|------|
| <b>Synthesis and purification of oligonucleotides.....</b>                                                                                      | p.S2 |
| <b>Table S1. MALDI-TOF data for synthetic GFP oligonucleotides.....</b>                                                                         | p.S3 |
| <b>Expression of pGFPuv plasmid.....</b>                                                                                                        | p.S4 |
| <b>Digestion of pGFPuv plasmid.....</b>                                                                                                         | p.S4 |
| <b>Ligation of 46 bp xDNA-containing segments into digested pGFPuv vector.....</b>                                                              | p.S4 |
| <b>Transformation of modified vectors into <i>E. coli</i>.....</b>                                                                              | p.S5 |
| <b>Colony picking and sequencing of plasmid DNA.....</b>                                                                                        | p.S5 |
| <b>Bacterial strains.....</b>                                                                                                                   | p.S5 |
| <b>Table S2. Bacterial strain genotypes.....</b>                                                                                                | p.S6 |
| <b>Preparation of chemically competent cells.....</b>                                                                                           | p.S6 |
| <b>Transformation of modified vectors into mutant <i>E. coli</i>.....</b>                                                                       | p.S6 |
| <b>Induction of an SOS response.....</b>                                                                                                        | p.S7 |
| <b>Table S3. Sequences and results with inserts containing one isolated xDNA base pair<br/>and two to four consecutive xDNA base pairs.....</b> | p.S7 |
| <b>Table S4. Sequences and results with inserts containing one isolated xDNA base pair<br/>and two to four consecutive xDNA base pairs.....</b> | p.S8 |
| <b>Table S5. Colony data summary of xDNA containing inserts relative to an<br/>unmodified control.....</b>                                      | p.S9 |

|                                                                                                                                                                                 |       |
|---------------------------------------------------------------------------------------------------------------------------------------------------------------------------------|-------|
| <b>Table S6.</b> Sequencing results of selected white colonies containing xDNA-modified inserts.....                                                                            | p.S10 |
| <b>Table S7.</b> Colony data summary of selected xDNA-containing GFP inserts in various mutant strains of <i>E. coli</i> .....                                                  | p.S11 |
| <b>Table S8.</b> Colony data summary of selected xDNA-containing inserts relative to the unmodified control (GFP.0) in <i>E. coli</i> cells with and without SOS induction..... | p.S12 |
| <b>Figure S1.</b> Normalized colony counts for xDNA-containing inserts xGFP.2, xGFP.6 and xGFP.7 in <i>E. coli</i> strains with deleted SOS polymerases.....                    | p.S12 |
| <b>Figure S2.</b> Normalized percent green colonies for xDNA-containing inserts relative to the unmodified control (GFP.0).....                                                 | p.S13 |
| <b>References</b> .....                                                                                                                                                         | p.S13 |

### Synthesis and purification of oligonucleotides.

Synthesis of dxA, dxG, dxT, dxC phosphoramidites were carried out as previously reported.<sup>1,2</sup> Oligodeoxynucleotides were synthesized on an Applied Biosystems 394 DNA/RNA synthesizer on a 1  $\mu$ mole scale and possessed a 3'-OH, and a 5'-phosphate group (Chemical Phosphorylation II reagent from Glen Research). Coupling employed standard  $\beta$ -cyanoethyl phosphoramidite chemistry, but with extended coupling time (600 s) for nonnatural nucleotides. All oligomers were deprotected in concentrated ammonium hydroxide (55 °C, 16 h), purified by preparative 20% denaturing polyacrylamide gel electrophoresis, and isolated by excision and extraction from the gel, followed by dialysis against water, or desalting via PolyPak cartridges. The recovered material was quantified by absorbance at 260 nm with molar extinction coefficients determined by the nearest neighbor method. Molar extinction coefficients for unnatural oligomers were estimated by adding the measured value of the molar extinction coefficient of the unnatural nucleoside (at 260 nm) to the calculated value for the natural DNA fragments. Molar extinction coefficients for xDNA nucleosides used were as follows: dxA,  $\epsilon_{260}=19,800 \text{ M}^{-1} \cdot \text{cm}^{-1}$ ; dxG,  $\epsilon_{260}=8,100 \text{ M}^{-1} \cdot \text{cm}^{-1}$ ; dxT,  $\epsilon_{260}=1,200 \text{ M}^{-1} \cdot \text{cm}^{-1}$ ; dxC,  $\epsilon_{260}=5,800 \text{ M}^{-1} \cdot \text{cm}^{-1}$ . Nonnatural oligomers were characterized by MALDI-TOF mass spectrometry. Their observed and expected masses are listed in Table S1.

**Table S1.** MALDI-TOF mass spectrometry data for unnatural oligodeoxynucleotides used in this study containing dxA, dxT, dxG, and dxC. Error with the instrument is within  $\pm 0.05\%$ .

| ID  | Template Sequence                                                                                                  | Calc.    | Obs.     |
|-----|--------------------------------------------------------------------------------------------------------------------|----------|----------|
| 1A  | 5'-pGTA CAG GAG CGC AC <b>xG</b> AT <b>T</b> TCT TTC AAA GAT GAC GGA AAC TAC AAG A-3'                              | 14354.30 | 14313.26 |
| 1T  | 3'-TC CTC GCG TGC TAA AGA AA <b>xG</b> TTT CTA CTG CCT <b>T</b> TTG ATG TTC TGC GCp-5'                             | 14203.70 | 14208.05 |
| 2A  | 5'-pGTA CAG GAG CGC ACT AT <b>T</b> TCT TTC AA <b>xA</b> GAT GAC GGA AAC TAC AAG A-3'                              | 14329.39 | 14329.49 |
| 2T  | 3'-TC CTC GCG TGA TAA <b>xAGA</b> AAG TTT CTA CTG CCT <b>T</b> TTG ATG TTC TGC GCp-5'                              | 14227.19 | 14229.33 |
| 3A  | 5'-pGTA CAG GAG CGC ACT AT <b>T</b> TCT TT <b>xC</b> AAA GAT GAC GGA AAC TAC AAG A-3'                              | 14344.39 | 14333.97 |
| 3T  | 3'-TC CTC GCG TGA TAA AGA AAG TTT CTA CTG <b>xCCT</b> TTG ATG TTC TGC GCp-5'                                       | 14242.19 | 14240.99 |
| 4A  | 5'-pGTA CAG GAG CGC ACT AT <b>T</b> TCT TTC AAA GA <b>xT</b> GAC GGA AAC TAC AAG A-3'                              | 14329.39 | 14326.10 |
| 4T  | 3'-TC CTC GCG TGA <b>xTAA</b> AGA AAG TTT CTA CTG CCT <b>T</b> TTG ATG TTC TGC GCp-5'                              | 14227.19 | 14224.90 |
| 5A  | 5'-pGTA CAG GAG CGC ACT AT <b>T</b> TCT TT <b>xC</b> <b>xAAA</b> GAT GAC GGA AAC TAC AAG A-3'                      | 14394.48 | 14389.27 |
| 5T  | 3'-TC CTC GCG TGA <b>xTxAA</b> AGA AAG TTT CTA CTG CCT <b>T</b> TTG ATG TTC TGC GCp-5'                             | 14277.28 | 14270.62 |
| 6A  | 5'-pGTA CAG GAG CGC ACT AT <b>T</b> TCT TT <b>xC</b> <b>xAxA</b> GAT GAC GGA AAC TAC AAG A-3'                      | 14444.57 | 14437.74 |
| 6T  | 3'-TC CTC GCG TGA <b>xTxAxA</b> AGA AAG TTT CTA CTG CCT <b>T</b> TTG ATG TTC TGC GCp-5'                            | 14327.37 | 14326.78 |
| 7A  | 5'-pGTA CAG GAG CGC ACT AT <b>T</b> TCT TT <b>xC</b> <b>xAxAxA</b> GAT GAC GGA AAC TAC AAG A-3'                    | 14494.66 | 14471.05 |
| 7T  | 3'-TC CTC GCG TGA <b>xTxAxA</b> <b>xAGA</b> AAG TTT CTA CTG CCT <b>T</b> TTG ATG TTC TGC GCp-5'                    | 14377.46 | 14458.87 |
| 8A  | 5'-pGTA CAG GAG CG <b>xC</b> ACG AT <b>T</b> TCT TTC AAA GAT GA <b>xC</b> GGA AAC TAC AAG A-3'                     | 14434.50 | 14421.30 |
| 8T  | 3'-TC CTC GCG TG <b>xC</b> TAA AGA AAG TTT <b>xCTA</b> CTG CCT <b>T</b> TTG ATG TTC TGC GCp-5'                     | 14283.30 | 14193.50 |
| 9A  | 5'-pGTA CAG GAG CGC <b>xACT</b> <b>xATT</b> TCT TTC AA <b>xA</b> GAT G <b>xAC</b> GGA AAC TAC AAG A-3'             | 14479.66 | 14480.80 |
| 9T  | 3'-TC CTC GCG TG <b>xA</b> T <b>xAA</b> AGA A <b>xAG</b> TTT CT <b>xA</b> CTG CCT <b>T</b> TTG ATG TTC TGC GCp-5'  | 14377.46 | 14285.76 |
| 10A | 5'-pGTA CAG GAG CGA ACA AT <b>xT</b> TC <b>xT</b> TTC AAA GA <b>xT</b> GAC GGA AAC TAC AAG A-3'                    | 14462.50 | 14413.87 |
| 10T | 3'-TC CTC GC <b>xT</b> TG <b>xT</b> TAA AGA AAG TTT CTA CTG CC <b>xT</b> TTG ATG TTC TGC GCp-5'                    | 14293.30 | 14289.39 |
| 11A | 5'-pGTA CAG GAG CGC ACT AT <b>T</b> TCT TT <b>xC</b> <b>xAxAxA</b> <b>xGxA</b> GAT GGA AAC TAC AAG A-3'            | 14594.84 | 14588.74 |
| 11T | 3'-TC CTC GCG TGA <b>xTxAxA</b> <b>xAxGxA</b> AAG TTT CTA CTG CCT <b>T</b> TTG ATG TTC TGC GCp-5'                  | 14477.64 | 14470.58 |
| 12A | 5'-pGTA CAG GAG CGC ACT AT <b>T</b> TCT T <b>xTxC</b> <b>xAxAxA</b> <b>xGxAxT</b> GAC GGA AAC TAC AAG A-3'         | 14695.02 | 14680.69 |
| 12T | 3'-TC CTC GCG TG <b>xA</b> <b>xTxAxA</b> <b>xAxGxA</b> <b>xAAG</b> TTT CTA CTG CCT <b>T</b> TTG ATG TTC TGC GCp-5' | 14577.82 | 14671.39 |

## **Cloning and expression experiments.**

### **Expression of the pGFPuv plasmid.**

The double stranded, 3.3 kb pGFPuv plasmid (Clontech, Cat No:632312), a high copy number plasmid yielding ~500 copies per cell, was expressed in BL21 (DE3) competent cells (Stratagene) by transforming 25-50 ng of the vector per the transformation protocol recommended by Stratagene. The transformed cells were plated on LB agar plates containing ampicillin and isopropyl thiogalactosidase (IPTG) and allowed to incubate at 37 °C overnight. On visualizing green colonies under long wavelength UV (365 nm) transilluminator, a green colony was picked and grown in LB media, and the plasmid DNA extracted with a MIDI prep kit (Qiagen #12923) and quantified by UV absorbance at 260 nm.

### **Plasmid digestion.**

The pGFPuv vector (3 µL, ~ 2 µg) was then digested by addition of 3 µL each of the restriction enzymes BsrGI and MluI (New England Biolabs), 5 µL of NEB Buffer 2, 5 µL of 10X BSA, and 31 µL of H<sub>2</sub>O (autoclaved) to an Eppendorf tube. The digest was allowed to proceed in a thermocycler at 37 °C for 6 h, followed by 65 °C for 20 min to denature the enzymes. After digestion, removal of the 5'-phosphate (to prevent self-ligation of the cut plasmid) was accomplished by addition (to the same Eppendorf tube) of 5 µL of antarctic phosphatase (or calf intestinal phosphatase (NEB) was used with the corresponding buffer) and 5 µL of 10X antarctic phosphatase buffer and then incubation for 1 h at 37 °C followed by denaturing at 65 °C for 20 min. The plasmid was purified on a 0.9% agarose (LMP) gel run at 20 volts for 12 h. The gel bands were visualized under a UV (365 nm) transilluminator, cut out (quickly, ~3 s), and the purified DNA was extracted with a plasmid gel extraction kit (Qiagen #28704). Concentration was determined by UV absorbance units at 260 nm.

### **Ligation of 46 bp xDNA-containing segments into digested pGFPuv vector.**

Ligations of xDNA-containing inserts were carried out at various vector:insert ratios (1:3, 1:5, 1:6, 1:8, 1:10). Solutions of xDNA inserts were prepared/annealed by adding 2.5 µL of each strand (100 ng/µL), 0.5 µL 1M MgCl<sub>2</sub>, and 94.5 µL H<sub>2</sub>O (autoclaved). This DNA solution was denatured in a thermocycler by heating to 72 °C for 3 min, then cooling slowly to room temperature. Appropriate volumes of the pGFPuv vector (~50 ng/µL), and annealed inserts (~2.5 ng/µL) were combined in an Eppendorf tube with 1 µL of 5X T4 DNA ligase buffer, 1 µL of T4 DNA ligase (New England

Biolabs), and H<sub>2</sub>O (autoclaved) to reach a volume of 10 µL. The ligation reaction was carried out at 16 °C for 12 h in a thermocycler.

#### **Transformation of modified vectors into *E. coli*.**

Transformation of the ligated inserts into BL21 (DE3) competent cells (Stratagene) was carried out per the transformation protocol described by Stratagene. For each transformation, ~1 to 10 ng of xDNA-containing insert were transformed into the cells, and after transformation, ~100 to 150 µL of the cells were plated on LB agar plates containing ampicillin and isopropyl thiogalactosidase (IPTG), and allowed to incubate at 37 °C for 20 h. Colonies were briefly visualized under long wavelength UV (365 nm), and the number of white and green colonies were documented. Transformation efficiencies were compared with that of a control ligation reaction under identical conditions using unmodified duplex DNA, which was otherwise identical in sequence to the xDNA-containing segment.

#### **Colony picking and sequencing of plasmid DNA.**

Green colonies (and some white colonies) from each transformation were picked, grown overnight at 37 °C in LB media, and the plasmid DNA was isolated using a mini prep kit (Qiagen #27104). The cloned region within the gene on the isolated DNA was sequenced (Sequetech, Mountain View, CA or Quintara Biosciences, Berkeley, CA) with the appropriate primers (GFPseq1.24).

#### **Mutant *E. coli* strains.**

##### **Bacterial strains.**

The bacterial strains used in this study are shown in Table S2. The bacterial strains were purchased from the *E. coli* Genetic Stock Center at Yale University. The *E. coli* cells were routinely grown in LB media containing 50 µg/mL kanamycin.

**Table S2.** Bacterial strain genotypes.

| Strain   | Deleted Gene       | Function/Gene Product                          | Genotype                                                                                                                                                                                                     |
|----------|--------------------|------------------------------------------------|--------------------------------------------------------------------------------------------------------------------------------------------------------------------------------------------------------------|
| BW25113  | --                 |                                                | F <sup>-</sup> , $\Delta(\text{araD-araB})567$ , $\Delta\text{lacZ4787}(\text{:rrnB-3})$ , $\lambda^-$ , <i>rph-1</i> , $\Delta(\text{rhaD-rhaB})568$ , <i>hsdR514</i>                                       |
| JW2703-2 | <i>mutS</i>        | methyl-mediated mismatch repair                | F <sup>-</sup> , $\Delta(\text{araD-araB})567$ , $\Delta\text{lacZ4787}(\text{:rrnB-3})$ , $\lambda^-$ , $\Delta\text{mutS738}(\text{:kan})$ , <i>rph-1</i> , $\Delta(\text{rhaD-rhaB})568$ , <i>hsdR514</i> |
| JW0704-1 | <i>nei</i>         | endonuclease VII                               | F <sup>-</sup> , $\Delta(\text{araD-araB})567$ , $\Delta\text{lacZ4787}(\text{:rrnB-3})$ , $\Delta\text{nei-764}(\text{:kan})$ , $\lambda^-$ , <i>rph-1</i> , $\Delta(\text{rhaD-rhaB})568$ , <i>hsdR514</i> |
| JW2928-1 | <i>mutY</i>        | adenine glycosylase: G-A repair                | F <sup>-</sup> , $\Delta(\text{araD-araB})567$ , $\Delta\text{lacZ4787}(\text{:rrnB-3})$ , $\lambda^-$ , $\Delta\text{mutY736}(\text{:kan})$ , <i>rph-1</i> , $\Delta(\text{rhaD-rhaB})568$ , <i>hsdR514</i> |
| JW3610-2 | <i>mutM (fpg)</i>  | formamidopyrimidine-DNA glycosylase            | F <sup>-</sup> , $\Delta(\text{araD-araB})567$ , $\Delta\text{lacZ4787}(\text{:rrnB-3})$ , $\lambda^-$ , $\Delta\text{mutM744}(\text{:kan})$ , <i>rph-1</i> , $\Delta(\text{rhaD-rhaB})568$ , <i>hsdR514</i> |
| JW4019-2 | <i>uvrA</i>        | excision nuclease: molecular matchmaker        | F <sup>-</sup> , $\Delta(\text{araD-araB})567$ , $\Delta\text{lacZ4787}(\text{:rrnB-3})$ , $\lambda^-$ , <i>rph-1</i> , $\Delta(\text{rhaD-rhaB})568$ , $\Delta\text{uvrA753}(\text{:kan})$ , <i>hsdR514</i> |
| JW0221-1 | <i>dinB</i>        | Pol IV                                         | F <sup>-</sup> , $\Delta(\text{araD-araB})567$ , $\Delta\text{dinB749}(\text{:kan})$ , $\Delta\text{lacZ4787}(\text{:rrnB-3})$ , $\lambda^-$ , <i>rph-1</i> , $\Delta(\text{rhaD-rhaB})568$ , <i>hsdR514</i> |
| JW1173-1 | <i>umuC</i>        | Pol V                                          | F <sup>-</sup> , $\Delta(\text{araD-araB})567$ , $\Delta\text{lacZ4787}(\text{:rrnB-3})$ , $\lambda^-$ , $\Delta\text{umuC773}(\text{:kan})$ , <i>rph-1</i> , $\Delta(\text{rhaD-rhaB})568$ , <i>hsdR514</i> |
| JW0059-1 | <i>polB (dinA)</i> | Pol II                                         | F <sup>-</sup> , $\Delta\text{polB770}(\text{:kan})$ , $\Delta(\text{araD-araB})567$ , $\Delta\text{lacZ4787}(\text{:rrnB-3})$ , $\lambda^-$ , <i>rph-1</i> , $\Delta(\text{rhaD-rhaB})568$ , <i>hsdR514</i> |
| JW0205-1 | <i>dnaQ (mutD)</i> | Pol III $\epsilon$ subunit: 3'→5' proofreading | F <sup>-</sup> , $\Delta(\text{araD-araB})567$ , $\Delta\text{dnaQ744}(\text{:kan})$ , $\Delta\text{lacZ4787}(\text{:rrnB-3})$ , $\lambda^-$ , <i>rph-1</i> , $\Delta(\text{rhaD-rhaB})568$ , <i>hsdR514</i> |

### Preparation of chemically competent cells.

Competent cells were prepared using the Z-Competent *E. coli* transformation kit (Zymo Research). A starter culture was grown at 37 °C for 8-12 h with vigorous shaking. An aliquot (100-500  $\mu\text{L}$ ) of the started culture was then added to 100 mL of Zymobroth (Zymo Research), and the culture was incubated with shaking at 18-22 °C until the OD<sub>600</sub> was 0.25-0.35. The cells were harvested, washed and resuspended in competent buffer per the manufacturer's instructions. The cell suspensions were aliquoted (200  $\mu\text{L}$ ) into microcentrifuge tubes and immediately frozen. The samples were stored at -80 °C until needed.

### Transformation of modified vectors into mutant *E. coli*.

Transformation of the ligated inserts into the competent cells was carried out per the transformation protocol described by Zymo Research. For each transformation, ~1 to 10 ng of xDNA-containing plasmid was transformed into the cells using a 90 s heat shock, and after transformation,

~250  $\mu$ L of the cells was plated on LB agar plates containing ampicillin (100  $\mu$ g/mL) and kanamycin (50  $\mu$ g/mL), and allowed to incubate at 37 °C for 14 h. Colonies were treated as previously described.

### Inducing an SOS response.

The SOS response was induced in *E. coli* cells (BW25113) using UV irradiation as described.<sup>1</sup> Briefly, cells were grown in 100 mL Zymobroth to an OD<sub>600</sub> of 0.3, after which they were pelleted, resuspended in 50 mL of MgSO<sub>4</sub>, and split. To induce the SOS response, half of the cells were irradiated with 254 nm light at 45 Joules/m<sup>2</sup> (UV Stratalinker 2400, Stratagene). Both the irradiated and uninduced cells were diluted 2-fold with LB media and incubated with shaking at 37 C for 20 min, and made chemically competent as previously described.

**Table S3.** Sequencing results for recovered plasmids. Modified GFP sequences and results with inserts containing one isolated xDNA base pair and two to four consecutive xDNA base pairs in the reading templates, showing successful reading and replacement of xDNA pairs. For each insert, between 10-15 colonies were picked for sequencing. All sequences containing silent mutations produced results shown in Table S3.

| Synthetic insert                   | Sequence                                                                                                                             | Sequencing Results        |
|------------------------------------|--------------------------------------------------------------------------------------------------------------------------------------|---------------------------|
| xGFP.0<br>(control)                | 5' GTA CAG GAG CGC ACT ATT TCT TTC AAA GAT GAC GGA AAC TAC AAG A<br>3' TC CTC GCG TGA TAA AGA AAG TTT CTA CTG CCT TTG ATG TTC TGC GC | No change                 |
| xGFP.1<br>(one xG-C bp)            | 5' GTA CAG GAG CGC ACG ATT TCT TTC AAA GAT GAC GGA AAC TAC AAG A<br>3' TC CTC GCG TGC TAA AGA AAG TTT CTA CTG CCT TTG ATG TTC TGC GC | xG replaced by G          |
| xGFP.2<br>(one xA-T bp)            | 5' GTA CAG GAG CGC ACT ATT TCT TTC AAA GAT GAC GGA AAC TAC AAG A<br>3' TC CTC GCG TGA TAA AGA AAG TTT CTA CTG CCT TTG ATG TTC TGC GC | xA replaced by A          |
| xGFP.3<br>(one xC-G bp)            | 5' GTA CAG GAG CGC ACT ATT TCT TTC AAA GAT GAC GGA AAC TAC AAG A<br>3' TC CTC GCG TGA TAA AGA AAG TTT CTA CTG CCT TTG ATG TTC TGC GC | xC replaced by C          |
| xGFP.4<br>(one xT-A bp)            | 5' GTA CAG GAG CGC ACT ATT TCT TTC AAA GAT GAC GGA AAC TAC AAG A<br>3' TC CTC GCG TGA TAA AGA AAG TTT CTA CTG CCT TTG ATG TTC TGC GC | xT replaced by T          |
| xGFP.5<br>(two consec. xDNA bps)   | 5' GTA CAG GAG CGC ACT ATT TCT TTC AAA GAT GAC GGA AAC TAC AAG A<br>3' TC CTC GCG TGA TAA AGA AAG TTT CTA CTG CCT TTG ATG TTC TGC GC | xCxA replaced by CA       |
| xGFP.6<br>(three consec. xDNA bps) | 5' GTA CAG GAG CGC ACT ATT TCT TTC AAA GAT GAC GGA AAC TAC AAG A<br>3' TC CTC GCG TGA TAA AGA AAG TTT CTA CTG CCT TTG ATG TTC TGC GC | xCxAxA replaced by CAA    |
| xGFP.7<br>(four consec. xDNA bps)  | 5' GTA CAG GAG CGC ACT ATT TCT TTC AAA GAT GAC GGA AAC TAC AAG A<br>3' TC CTC GCG TGA TAA AGA AAG TTT CTA CTG CCT TTG ATG TTC TGC GC | xCxAxAxA replaced by CAAA |

xDNA bases in **red**, silent mutations in **blue**.

**Table S4.** Modified GFP sequences and results with inserts containing multiple isolated xDNA base pairs and six and eight consecutive xDNA base pairs in the reading templates, showing lack of colony growth in these cases.

| Synthetic insert                  | Sequence |     |     |     |     |     |     |     |     |     |     |     |     |     |     |     | Sequencing Results |                      |
|-----------------------------------|----------|-----|-----|-----|-----|-----|-----|-----|-----|-----|-----|-----|-----|-----|-----|-----|--------------------|----------------------|
| xGFP.8<br>(two xC-G bp)           | 5'       | GTA | CAG | GAG | CGC | ACG | ATT | TCT | TTC | AAA | GAT | GAC | GGA | AAC | TAC | AAG | A                  | No colonies observed |
|                                   | 3'       |     | TC  | CTC | GCG | TGC | TAA | AGA | AAG | TTT | CTA | CTG | CCT | TTG | ATG | TTC | TGC                |                      |
| xGFP.9<br>(three xT-A bp)         | 5'       | GTA | CAG | GAG | CGA | ACA | ATT | TCT | TTC | AAA | GAT | GAC | GGA | AAC | TAC | AAG | A                  | No colonies observed |
|                                   | 3'       |     | TC  | CTC | GCT | TGT | TAA | AGA | AAG | TTT | CTA | CTG | CCT | TTG | ATG | TTC | TGC                |                      |
| xGFP.10<br>(four xA-T bp)         | 5'       | GTA | CAG | GAG | CGC | ACT | ATT | TCT | TTC | AAA | GAT | GAC | GGA | AAC | TAC | AAG | A                  | No colonies observed |
|                                   | 3'       |     | TC  | CTC | GCG | TGA | TAA | AGA | AAG | TTT | CTA | CTG | CCT | TTG | ATG | TTC | TGC                |                      |
| xGFP.11<br>(six cons. xDNA bps)   | 5'       | GTA | CAG | GAG | CGC | ACT | ATT | TCT | TTC | AAA | GAT | GAC | GGA | AAC | TAC | AAG | A                  | No colonies observed |
|                                   | 3'       |     | TC  | CTC | GCG | TGA | TAA | AGA | AAG | TTT | CTA | CTG | CCT | TTG | ATG | TTC | TGC                |                      |
| xGFP.12<br>(eight cons. xDNA bps) | 5'       | GTA | CAG | GAG | CGC | ACT | ATT | TCT | TTC | AAA | GAT | GAC | GGA | AAC | TAC | AAG | A                  | No colonies observed |
|                                   | 3'       |     | TC  | CTC | GCG | TGA | TAA | AGA | AAG | TTT | CTA | CTG | CCT | TTG | ATG | TTC | TGC                |                      |

xDNA bases in **red**, silent mutations in **blue**.



**Table S5.** Colony counting data with xDNA-containing GFP inserts relative to an unmodified control insert (containing no xDNA bases), under varied conditions of vector:insert ratio during transfection.

| <b>GFP insert</b>                                    | <b>Vector:<br/>Insert</b> | <b># green<br/>colonies</b> | <b># white<br/>colonies</b> | <b># total<br/>colonies</b> |
|------------------------------------------------------|---------------------------|-----------------------------|-----------------------------|-----------------------------|
| <b>None</b>                                          | NA                        | 2                           | 12                          | 14                          |
| <b>xGFP.0</b><br>(control)                           | 1:2                       | 83                          | 16                          | 99                          |
|                                                      | 1:3                       | 116                         | 11                          | 127                         |
|                                                      | 1:5 <sup>a</sup>          | 44                          | 12                          | 56                          |
| <b>xGFP.1</b><br>(one xG-C bp)                       | 1:2                       | 15                          | 7                           | 22                          |
|                                                      | 1:3                       | 14                          | 6                           | 20                          |
|                                                      | 1:5                       | 20                          | 9                           | 29                          |
|                                                      | 1:8 <sup>a</sup>          | 18                          | 6                           | 24                          |
| <b>xGFP.2</b><br>(one xA-T bp)                       | 1:8 <sup>a</sup>          | 7                           | 5                           | 12                          |
| <b>xGFP.3</b><br>(one xC-G bp)                       | 1:8 <sup>a</sup>          | 5                           | 3                           | 8                           |
| <b>xGFP.4</b><br>(one xT-A bp)                       | 1:8 <sup>a</sup>          | 5                           | 5                           | 10                          |
| <b>xGFP.5</b><br>(two cons. xDNAs)                   | 1:8 <sup>a</sup>          | 7                           | 2                           | 9                           |
| <b>xGFP.6</b><br>(three cons. xDNAs)                 | 1:8 <sup>a</sup>          | 6                           | 4                           | 10                          |
| <b>xGFP.7</b><br>(four cons. xDNAs)                  | 1:2                       | 0                           | 6                           | 6                           |
|                                                      | 1:3                       | 2                           | 0                           | 2                           |
|                                                      | 1:5 <sup>a</sup>          | 10                          | 4                           | 14                          |
|                                                      | 1:8 <sup>a</sup>          | 19                          | 7                           | 26                          |
| <b>xGFP.8<sup>b</sup></b><br>(two xC-G bps)          | 1:2                       | 0                           | 0                           | 0                           |
|                                                      | 1:3                       | 0                           | 2                           | 2                           |
|                                                      | 1:5                       | 3                           | 6                           | 9                           |
|                                                      | 1:8                       | 4                           | 1                           | 5                           |
| <b>xGFP.9<sup>b</sup></b><br>(three xT-A bps)        | 1:2                       | 2                           | 9                           | 11                          |
|                                                      | 1:3                       | 1                           | 4                           | 5                           |
|                                                      | 1:5                       | 0                           | 1                           | 1                           |
|                                                      | 1:8                       | 1                           | 0                           | 1                           |
| <b>xGFP.10<sup>b</sup></b><br>(four xA-T bps)        | 1:2                       | 1                           | 1                           | 2                           |
|                                                      | 1:3                       | 0                           | 4                           | 4                           |
|                                                      | 1:5                       | 0                           | 0                           | 0                           |
|                                                      | 1:8                       | 6                           | 0                           | 6                           |
| <b>xGFP.11<sup>b</sup></b><br>(six cons. xDNA bps)   | 1:8 <sup>a</sup>          | 5                           | 3                           | 8                           |
| <b>xGFP.12<sup>b</sup></b><br>(eight cons. xDNA bps) | 1:8 <sup>a</sup>          | 0                           | 2                           | 2                           |

<sup>a</sup>average colonies for three trials. <sup>b</sup>no colonies contained silent mutations.

**Table S6.** Sequencing results of selected white colonies containing xDNA-modified inserts, showing that all mutations occurred at natural bases rather than xDNA bases.

original      5' GTA CAG GAG CGC ACT ATT TCT TTC AAA GAT GAC GGA AAC TAC AAG A  
 3'            TC CTC GCG TGA TAA AGA AAG TTT CTA CTG CCT TTG ATG TTC TGC GC

| Synthetic insert                  | Observed Sequence                                                    | Sequencing Results                   |
|-----------------------------------|----------------------------------------------------------------------|--------------------------------------|
| xGFP.1<br>(one xG-C bp)           | 5'-GTA CAG GAA GCG CAC GAT TTC TTT CAA AGA TGA CGG AAA CTA CAA GA-3' | xG replaced by G; G insertion        |
| xGFP.2<br>(one xA-T bp)           | 5'-GTA CAG GAG CGC ACT ATT TCT TTC AAA GAT GAC AAC TAC AAG A-3'      | xA replaced by A; GGA deleted        |
| xGFP.3<br>(one xC-G bp)           | 5'-GTA CAG GAG CGC ACT ATT TCT TTA AAG ATG ACG GAA ACT ACA AGA C-3'  | C deletion                           |
| xGFP.5<br>(two consec. xDNA bps)  | 5'-GTA CAG GAG CGC ACT ATT TCT TTC AAG ATG ACG GAA ACT ACA AGA C-3'  | xCxA replaced by CA; A deletion      |
| xGFP.7<br>(four consec. xDNA bps) | 5'-GTA CAG GAG GCG CAC TAT TTC TTT CAA AGA TGA CGG AAA CTA CAA GA-3' | xCxAxA replaced by CAAA; G insertion |

xDNA residues in **red**. Silent mutations in **blue**. Differences from expected sequence underlined.

**Table S7.** Colony counting data of selected xDNA-containing GFP inserts in various mutant strains of *E. coli* lacking DNA repair activities.

| <b>GFP insert</b>                             | <b>Deleted Gene</b> | <b># green colonies<sup>a</sup></b> | <b># white colonies<sup>a</sup></b> | <b># total colonies<sup>a</sup></b> |
|-----------------------------------------------|---------------------|-------------------------------------|-------------------------------------|-------------------------------------|
| <b>xGFP.0</b><br>( <i>control</i> )           | --                  | 348.3                               | 57.7                                | 406.0                               |
|                                               | nei                 | 202.5                               | 29.5                                | 232.0                               |
|                                               | mutY                | 320.8                               | 52.5                                | 373.3                               |
|                                               | mutM (fpg)          | 220.8                               | 35.8                                | 256.5                               |
|                                               | uvrA                | 186.3                               | 25.0                                | 211.3                               |
|                                               | mutS                | 92.7                                | 12.3                                | 105.0                               |
|                                               | polB                | 788.0                               | 75.3                                | 863.3                               |
|                                               | dinB                | 282.0                               | 34.3                                | 316.3                               |
|                                               | umuC                | 662.7                               | 86.0                                | 748.7                               |
|                                               | mutD                | 189.0                               | 24.7                                | 213.7                               |
| <b>xGFP.2</b><br>( <i>one xA-T bp</i> )       | --                  | 60.7                                | 53.0                                | 113.7                               |
|                                               | nei                 | 65.5                                | 36.5                                | 102.0                               |
|                                               | mutY                | 189.3                               | 113.5                               | 302.8                               |
|                                               | mutM (fpg)          | 163.5                               | 92.0                                | 255.5                               |
|                                               | uvrA                | 32                                  | 25                                  | 57                                  |
|                                               | mutS                | 33.0                                | 22.0                                | 55.0                                |
|                                               | polB                | 267.3                               | 182.7                               | 450.0                               |
|                                               | dinB                | 36.0                                | 32.7                                | 68.7                                |
|                                               | umuC                | 127.0                               | 89.7                                | 216.7                               |
|                                               | mutD                | 41.0                                | 29.0                                | 70.0                                |
| <b>xGFP.6</b><br>( <i>three cons. xDNAs</i> ) | --                  | 33.7                                | 12.1                                | 45.9                                |
|                                               | nei                 | 18.3                                | 6.5                                 | 24.8                                |
|                                               | mutY                | 21                                  | 9                                   | 30                                  |
|                                               | mutM (fpg)          | 15.8                                | 3.5                                 | 19.3                                |
|                                               | uvrA                | 6.5                                 | 4.0                                 | 10.5                                |
|                                               | mutS                | 14.3                                | 4.7                                 | 19.0                                |
|                                               | polB                | 139.3                               | 44.0                                | 183.3                               |
|                                               | dinB                | 43.0                                | 14.5                                | 60.7                                |
|                                               | umuC                | 55.0                                | 19.3                                | 74.3                                |
|                                               | mutD                | 29.8                                | 14.3                                | 44.0                                |
| <b>xGFP.7</b><br>( <i>four cons. xDNAs</i> )  | --                  | 7.8                                 | 3.5                                 | 11.2                                |
|                                               | nei                 | 2                                   | 2                                   | 4                                   |
|                                               | mutY                | 3                                   | 3                                   | 6                                   |
|                                               | mutM (fpg)          | 4.3                                 | 4.8                                 | 9.0                                 |
|                                               | uvrA                | 8.8                                 | 4.8                                 | 13.5                                |
|                                               | mutS                | 2.7                                 | 0.7                                 | 3.3                                 |
|                                               | polB                | 11.7                                | 9.7                                 | 21.3                                |
|                                               | dinB                | 12.3                                | 7.7                                 | 20.0                                |
|                                               | umuC                | 14.3                                | 6.7                                 | 21.0                                |
|                                               | mutD                | 4                                   | 4.7                                 | 8.7                                 |

<sup>a</sup>average colony numbers for at least three trials.

**Table S8.** SOS induction has little effect on GFP expression: Colony count data with selected xDNA-containing inserts relative to the unmodified control (GFP.0) in *E. coli* cells with and without SOS induction.

| GFP insert |      | # green colonies | # white colonies | # total colonies | % green |
|------------|------|------------------|------------------|------------------|---------|
| GFP.0      | -SOS | 348.3            | 57.7             | 406.0            | 85.8    |
|            | +SOS | 76.7             | 10.7             | 87.3             | 87.8    |
| xGFP.2     | -SOS | 60.7             | 53.0             | 113.7            | 53.4    |
|            | +SOS | 12.5             | 8.0              | 20.5             | 61.0    |
| xGFP.6     | -SOS | 33.7             | 12.1             | 45.9             | 73.5    |
|            | +SOS | 8.3              | 3.0              | 11.2             | 73.7    |
| xGFP.7     | -SOS | 7.8              | 3.5              | 11.2             | 69.2    |
|            | +SOS | 3.3              | 0.9              | 4.1              | 79.3    |

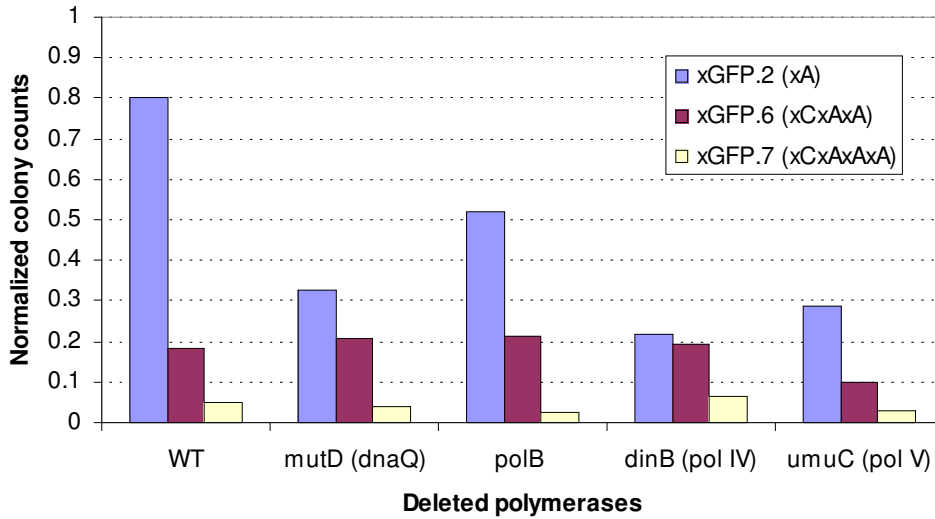

**Figure S1.** Normalized total colony counts for xDNA-containing inserts xGFP.2, xGFP.6 and xGFP.7 in *E. coli* strains with deleted SOS polymerases. Note that single xDNA substitutions (xGFP.2) are bypassed somewhat less efficiently with deletion of individual repair polymerases, but multiple substitutions (xGFP.6 and .7) are relatively unaffected.

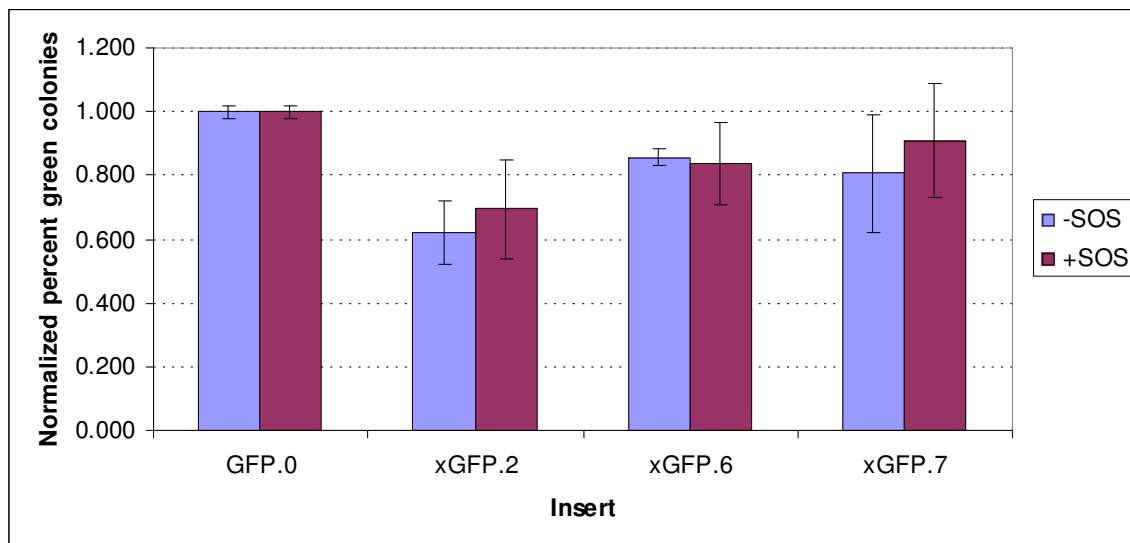

**Figure S2.** Normalized percent green colonies for xDNA-containing inserts relative to the unmodified control (GFP.0).

## References

1. Delaney, J.C.; Henderson, P.T.; Helquist, S.A.; Morales, J.C.; Essigmann, J.M. & Kool, E.T. *Proc. Natl. Acad. Sci. USA* **2003**, *100*, 4469-4473.
